# Supplementary material for: Hydrolyzable Additive-Based Silicone Elastomers: A New Approach for Antifouling Coatings
Source: MDPI journal article supplement (doi:10.3390/polym11020305), 2019-02-12
Supplement: s1 [file s1]

# Hydrolyzable Additive-Based Silicone Elastomers: A New Approach for Antifouling Coatings

Laure Gevaux <sup>1,\*</sup>, Marlène Lejars <sup>1</sup>, André Margailan <sup>1</sup>, Jean-François Briand <sup>1</sup>, Robert Bunet <sup>2</sup> and Christine Bressy <sup>1</sup>

<sup>1</sup> Laboratoire Matériaux Polymères Interfaces Environnement Marin (MAPIEM), Université de Toulon, EA 4323, 83957 La Garde, France; marlene.lejars@univ-tln.fr (M.L.); andre.margaillan@univ-tln.fr (A.M.); jean-francois.briand@univ-tln.fr (J.-F.B.); christine.bressy@univ-tln.fr (C.B.)

<sup>2</sup> Institut Océanographique Paul Ricard, Ile des Embiez, 83140 Six-Fours-les-Plages, France; robert.bunet@institut-paul-ricard.org

\* Correspondence: laure.gevaux@univ-tln.fr

Received: 23 January 2019; Accepted: 8 February 2019; Published: 12 February 2019

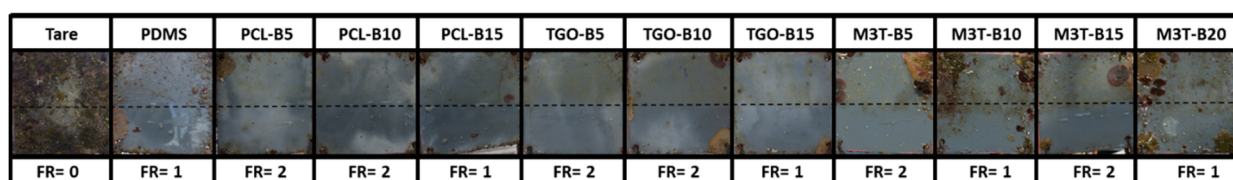

**Figure S1.** Evaluation of the fouling release ability after 8 months thanks to the cleaning of the lower half of the panel by means of a wetted sponge.

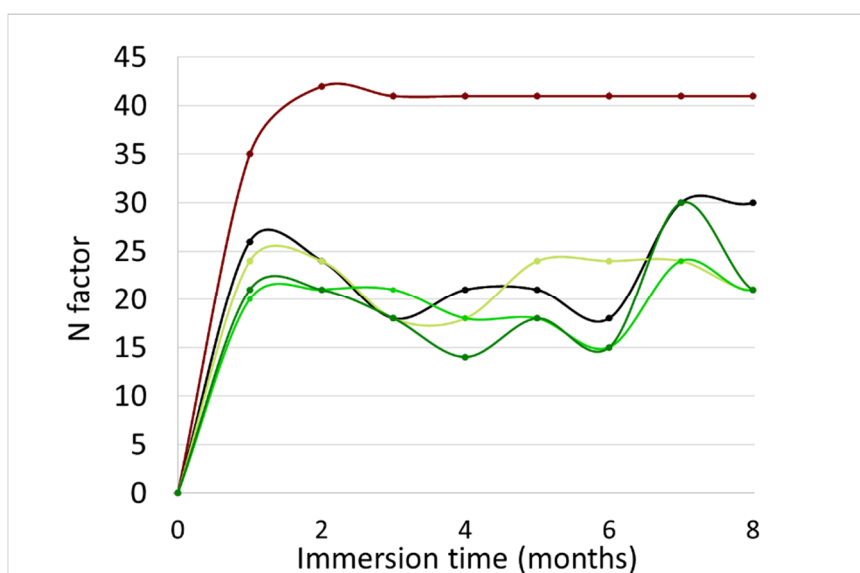

**Figure S2.** Evolution of the N factor of PCL-BX coated panels immersed for 8 months in Toulon bay with PVC panel (brown curve), PDMS reference (black curve), PCL-B5 (light green), PCL-B10 (medium green), PCL-B15 (dark green).

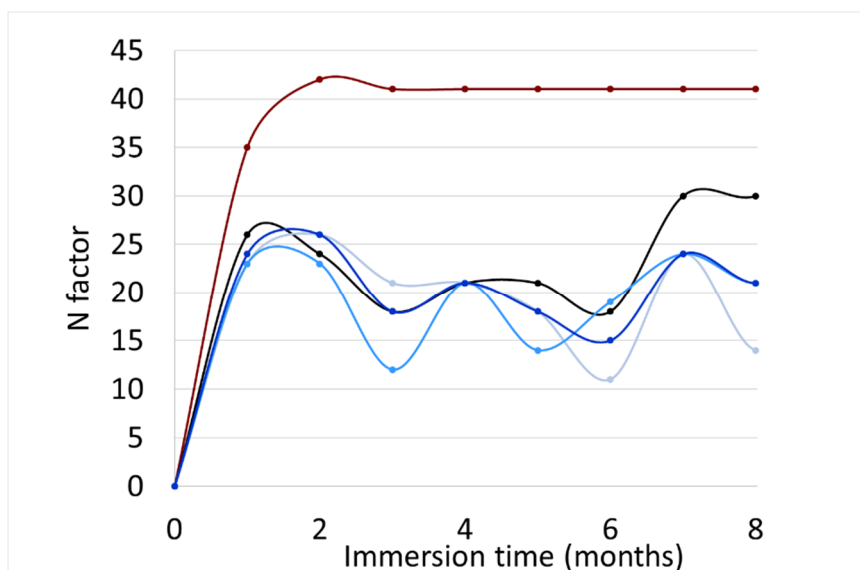

**Figure S3.** Evolution of the N factor of TGO-BX coated panels immersed for 8 months in Toulon bay with PVC panel (brown curve), PDMS reference (black curve), TGO-B5 (light blue), TGO-B10 (medium blue), TGO-B15 (dark blue).

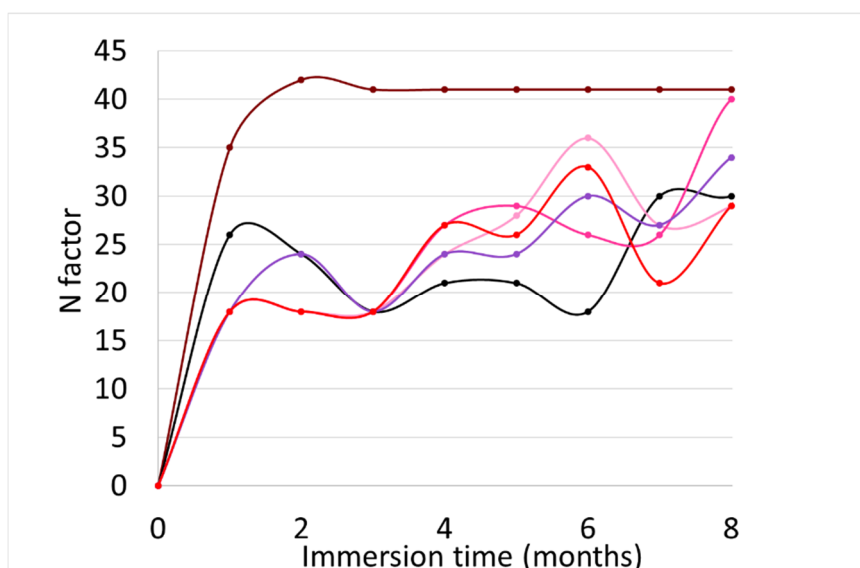

**Figure S4.** Evolution of the N factor of M3T-BX coated panels immersed for 8 months in Toulon bay with PVC panel (brown curve), PDMS reference (black curve), M3T-B5 (light pink), M3T-B10 (dark pink), M3T-B15 (purple) and M3T-B20 (red).

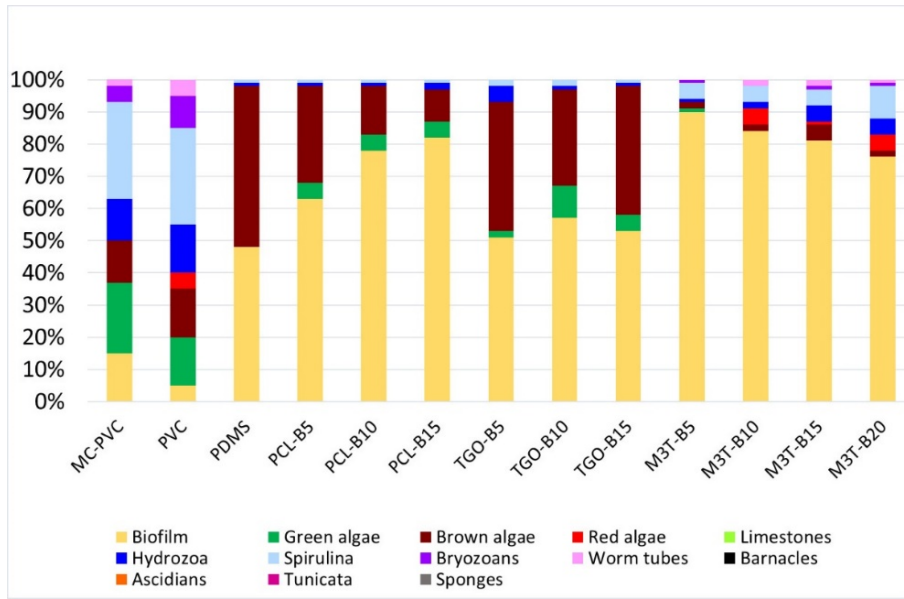

**Figure S5.** Determination of the percentage of the coated surface covered by several type of marine organisms for 2 months of immersion (MC-PVC corresponds to a monthly changed PVC panel to show the seasonal variations).

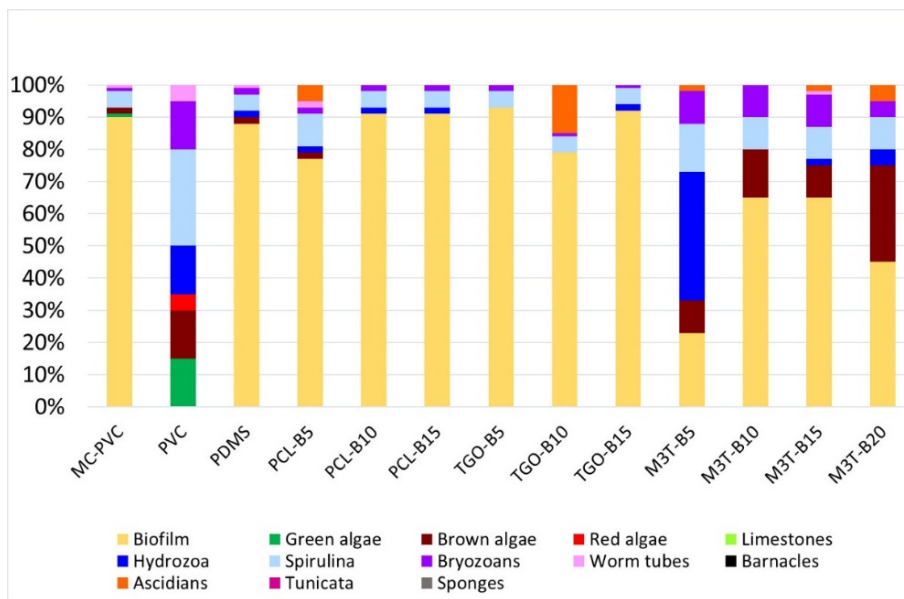

**Figure S6.** Determination of the percentage of the coated surface covered by several type of marine organisms for 6 months of immersion in Toulon bay (MC-PVC corresponds to a monthly changed PVC panel to show the seasonal variations).

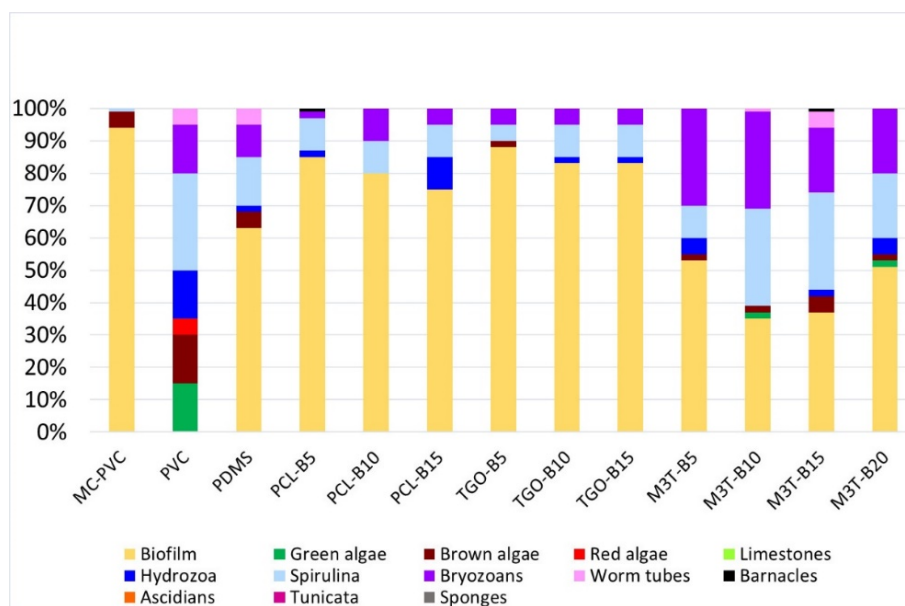

**Figure S7.** Determination of the percentage of the coated surface covered by several type of marine organisms for 8 months of immersion in Toulon bay (MC-PVC corresponds to a monthly changed PVC panel to show the seasonal variations).

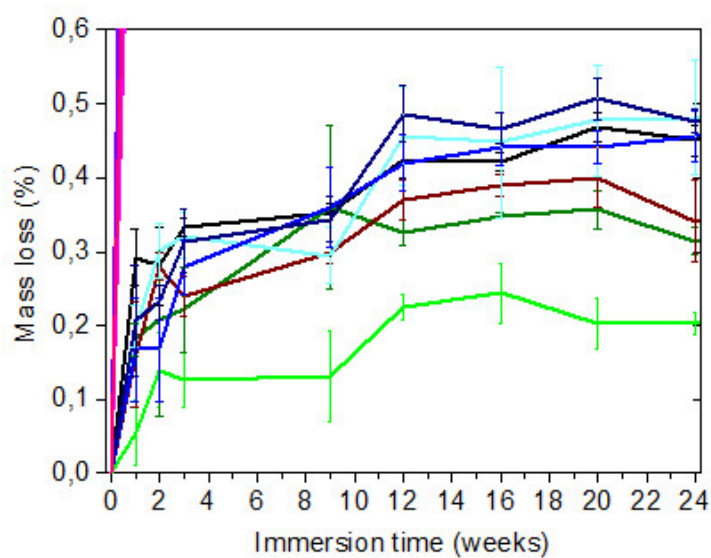

**Figure S8.** Mass loss (%) in deionized water at room temperature of PDMS reference (black curve), TGO-B5 (light blue), TGO-B10 (medium blue), TGO-B15 (dark blue), PCL-B5 (light green), PCL-B10 (medium green) and PCL-B15 (brown).

**Table S1.** Amount of cypris larvae tested on each coating, amount of fixed cypris larvae and the resulting adhesion percentage values.

| Tested coating | Total tested cypris larvae | Fixed cypris larvae | Adhesion percentage (%) | Average adhesion percentage (%) | Standard deviation (%) |
|----------------|----------------------------|---------------------|-------------------------|---------------------------------|------------------------|
| PS             | 9                          | 6                   | 66,7                    | 87                              | 16                     |
|                | 9                          | 9                   | 100,0                   |                                 |                        |
|                | 11                         | 11                  | 100,0                   |                                 |                        |
|                | 21                         | 17                  | 81,0                    |                                 |                        |
| PDMS           | 8                          | 5                   | 62,5                    | 72                              | 21                     |
|                | 15                         | 15                  | 100,0                   |                                 |                        |
|                | 6                          | 3                   | 50,0                    |                                 |                        |
|                | 4                          | 3                   | 75,0                    |                                 |                        |
| PCL-B5         | 6                          | 0                   | 0,0                     | 38                              | 35                     |
|                | 3                          | 2                   | 66,7                    |                                 |                        |
|                | 19                         | 13                  | 68,4                    |                                 |                        |
|                | 6                          | 1                   | 16,7                    |                                 |                        |
| PCL-B10        | 10                         | 10                  | 100,0                   | 48                              | 49                     |
|                | 8                          | 1                   | 12,5                    |                                 |                        |
|                | 7                          | 0                   | 0,0                     |                                 |                        |
|                | 10                         | 8                   | 80,0                    |                                 |                        |
| PCL-B15        | 7                          | 4                   | 57,1                    | 25                              | 30                     |
|                | 7                          | 3                   | 42,9                    |                                 |                        |
|                | 3                          | 0                   | 0,0                     |                                 |                        |
|                | 6                          | 0                   | 0,0                     |                                 |                        |
| TGO-B5         | 8                          | 4                   | 50,0                    | 68                              | 15                     |
|                | 9                          | 7                   | 77,8                    |                                 |                        |
|                | 27                         | 22                  | 81,5                    |                                 |                        |
|                | 8                          | 5                   | 62,5                    |                                 |                        |
| TGO-B10        | 17                         | 15                  | 88,2                    | 88                              | 9                      |
|                | 20                         | 17                  | 85,0                    |                                 |                        |
|                | 15                         | 15                  | 100,0                   |                                 |                        |
|                | 14                         | 11                  | 78,6                    |                                 |                        |
| TGO-B15        | 7                          | 0                   | 0,0                     | 20                              | 24                     |
|                | 7                          | 2                   | 28,6                    |                                 |                        |
|                | 5                          | 0                   | 0,0                     |                                 |                        |
|                | 10                         | 5                   | 50,0                    |                                 |                        |
| M3T-B5         | 5                          | 3                   | 60,0                    | 79                              | 16                     |
|                | 9                          | 7                   | 77,8                    |                                 |                        |
|                | 5                          | 5                   | 100,0                   |                                 |                        |
|                | 9                          | 7                   | 77,8                    |                                 |                        |
| M3T-B10        | 4                          | 2                   | 50,0                    | 30                              | 18                     |
|                | 8                          | 1                   | 12,5                    |                                 |                        |
|                | 5                          | 2                   | 40,0                    |                                 |                        |
|                | 11                         | 2                   | 18,2                    |                                 |                        |
| M3T-B15        | 5                          | 0                   | 0,0                     | 13                              | 19                     |
|                | 8                          | 1                   | 12,5                    |                                 |                        |
|                | 22                         | 0                   | 0,0                     |                                 |                        |
|                | 5                          | 2                   | 40,0                    |                                 |                        |

|         |    |   |      |   |   |
|---------|----|---|------|---|---|
| M3T-B20 | 6  | 0 | 0,0  | 7 | 8 |
|         | 9  | 0 | 0,0  |   |   |
|         | 14 | 2 | 14,3 |   |   |
|         | 15 | 2 | 13,3 |   |   |

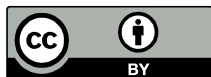

© 2019 by the authors. Submitted for possible open access publication under the terms and conditions of the Creative Commons Attribution (CC BY) license (<http://creativecommons.org/licenses/by/4.0/>).
